# Supplementary material for: The dependence of oxygen sensitivity on the molecular structures of Ir(iii) complexes and their application for photostable and reversible luminescent oxygen sensing
Source: Royal Society of Chemistry journal article supplement (doi:10.1039/c9ra02277e), 2019-01-01
Supplement: c9ra02277e1.pdf [file c9ra02277e1.pdf]

# Electronic Supplementary Information

## The dependence of oxygen sensitivity on molecular structures of Ir(III) complexes and application for photostable and reversible luminescent oxygen sensing

Yang Xing,<sup>a</sup> Chengfang Qiao,<sup>b</sup> Xinmin Li,<sup>c</sup> Chun Li,<sup>a</sup> Honghao Wang,<sup>a</sup> Fayun Li,<sup>a</sup> Ling Di,<sup>\*ad</sup> Zhanxu Yang<sup>\*a</sup>

<sup>a</sup> College of Chemistry, Chemical Engineering, and Environmental Engineering, Liaoning Shihua University, Fushun 113001, China. E-mail: [diling@lnpu.edu.cn](mailto:diling@lnpu.edu.cn) (L. Di); [zxyanglnpu@163.com](mailto:zxyanglnpu@163.com) (Z. Yang)

<sup>b</sup> College of Chemical Engineering and Modern Materials, Shangluo University, Shangluo 726000, China

<sup>c</sup> School of Pharmacy, Zunyi Medical University, Zunyi, 563000, China.

<sup>d</sup> State Key Laboratory of Fine Chemicals, Dalian University of Technology, Linggong Road 2, Dalian 116024, China.

### Contents

|                                                                          |   |
|--------------------------------------------------------------------------|---|
| <sup>1</sup> H NMR of 2-(3-Bromophenyl)pyridine and Ir(ppy) <sub>3</sub> | 2 |
| Fig. S1                                                                  | 2 |
| Fig. S2                                                                  | 2 |
| Fig. S3                                                                  | 3 |
| Fig. S4                                                                  | 3 |
| Table S1                                                                 | 3 |
| Table S2                                                                 | 4 |
| Table S3                                                                 | 4 |
| Table S4                                                                 | 5 |
| The limits of detection                                                  | 5 |
| References                                                               | 5 |

**2-(3-Bromophenyl)pyridine.**  $^1\text{H NMR}$  (500 MHz,  $\text{CDCl}_3$ ):  $\delta$  8.70 (d, 1H), 8.17 (s, 1H), 7.91 (d, 1H), 7.77 (td, 1H), 7.71 (d, 1H), 7.54 (dd, 1H), 7.34 (t, 1H), 7.29–7.25 (m, 1H).<sup>1</sup>

**$\text{Ir}(\text{ppy})_3$ :**  $^1\text{H NMR}$  (500 MHz,  $\text{CDCl}_3$ )  $\delta$  7.87 (d, 3H), 7.65 (d, 3H), 7.58 (t, 3H), 7.53 (d, 3H), 6.87 (dd, 12H).<sup>2</sup>

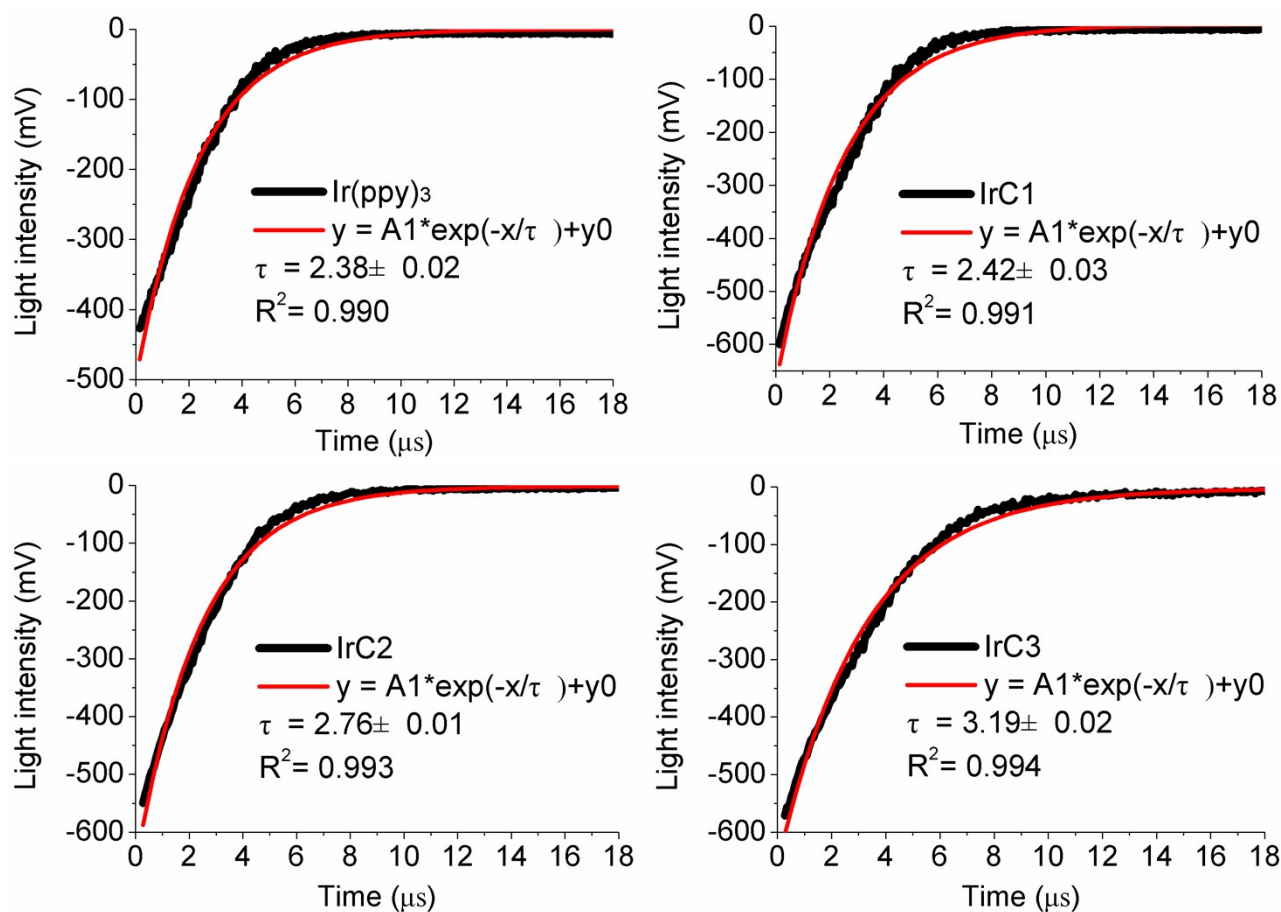

**Fig. S1.** Luminescent decay curves of Ir(III) complexes in degassed THF. Monoexponential decay regression gave lifetimes.

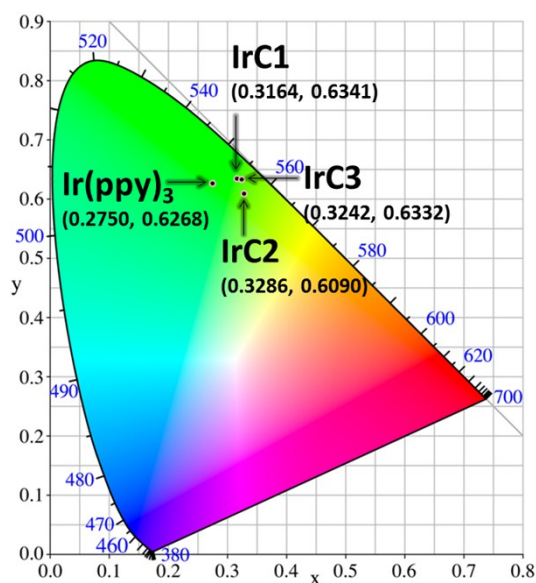

**Fig. S2.** CIE plots for Ir(III) complexes.

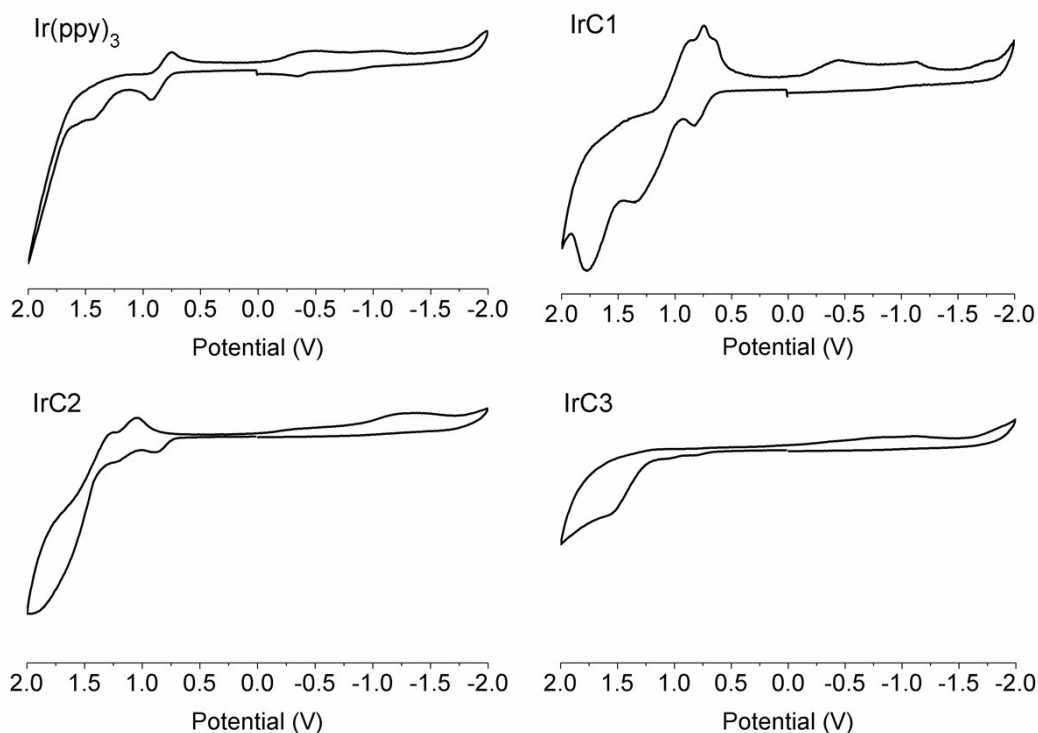

**Fig. S3.** Cyclic voltammograms of IrC1-IrC3 and Ir(ppy)<sub>3</sub>. 0.1 M [Bu<sub>4</sub>N]PF<sub>6</sub> in THF, scan rate 100 mV s<sup>-1</sup>, measured using saturated calomel electrode (SCE) as the standard.

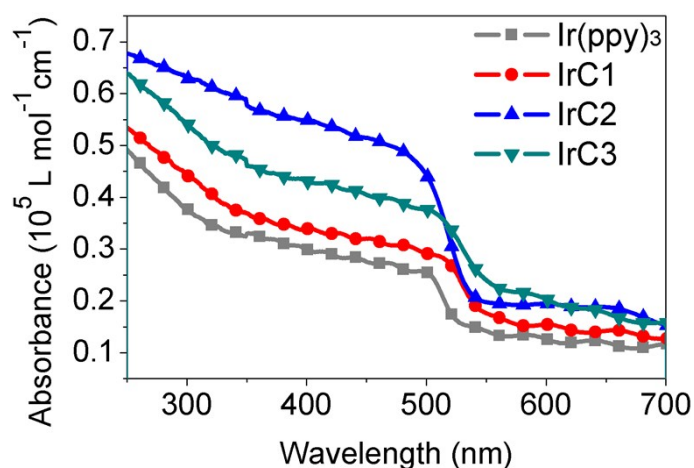

**Fig. S4.** The solid UV-vis spectra of IrC1-IrC3 and Ir(ppy)<sub>3</sub>

**Table S1.** Parameters of oxygen sensing of IrC1-IrC3 and Ir(ppy)<sub>3</sub> (fitting of the result to the two-site model).

| Complexes            | $\lambda_{\text{ex}}(\text{nm})$ | $\lambda_{\text{em}}(\text{nm})$ | $f_1^a$ | $f_2^a$ | $K_{\text{SV}1}^b$ | $K_{\text{SV}2}^b$ | $r^{2c}$ | $K_{\text{SV}}^{\text{app}d}$ |
|----------------------|----------------------------------|----------------------------------|---------|---------|--------------------|--------------------|----------|-------------------------------|
| Ir(ppy) <sub>3</sub> | 400                              | 511                              | 0.985   | 0.015   | 121.4              | 0.00001            | 0.99983  | 119.6                         |
| IrC1                 | 400                              | 522                              | 0.998   | 0.002   | 202.6              | 0.00001            | 0.99985  | 202.2                         |
| IrC2                 | 400                              | 516                              | 0.999   | 0.001   | 144.2              | 0.00001            | 0.99948  | 144.1                         |
| IrC3                 | 400                              | 525                              | 0.999   | 0.001   | 181.3              | 0.00001            | 0.99978  | 181.1                         |

<sup>a</sup> Ratio of the two portions of the Ir(III) complexes. <sup>b</sup> Quenching constant of the two portions (bar<sup>-1</sup>). <sup>c</sup> Determination coefficients. <sup>d</sup> Weighted quenching constant (bar<sup>-1</sup>).

**Table S2.** The phosphorescent decay times ( $\tau$ ), emission intensity ratios ( $I_0/I_{100-1}$ ), and the ratios of collision radii ( $\sigma_{\text{Ir(III)}}/\sigma_{\text{Ir(ppy)}_3}$ ) of all the Ir(III) complexes.

| Ir(III) complexes                                      | Data                                             | 1     | 2     | 3     | 4     | 5     | Mean        | Standard |
|--------------------------------------------------------|--------------------------------------------------|-------|-------|-------|-------|-------|-------------|----------|
| Ir(ppy) <sub>3</sub><br>$\tau_0$ (2.38 $\mu\text{s}$ ) | $I_0$                                            | 511.3 | 518.6 | 511.6 | 532.6 | 536.4 | 522.10      | 11.77    |
|                                                        | $I_{100}$                                        | 6.4   | 5.9   | 6.3   | 6.3   | 6.0   | 6.18        | 0.22     |
|                                                        | $I_0/I_{100-1}$                                  | 78.4  | 86.9  | 80.6  | 83.4  | 88.1  | 83.48       | 4.10     |
| IrC1<br>$\tau_0$ (2.42 $\mu\text{s}$ )                 | $I_0$                                            | 871.1 | 930.1 | 900.1 | 857.4 | 857.6 | 883.26      | 31.43    |
|                                                        | $I_{100}$                                        | 5.1   | 4.7   | 4.9   | 4.9   | 4.7   | 4.86        | 0.17     |
|                                                        | $I_0/I_{100-1}$                                  | 169.8 | 194.4 | 181.9 | 174.7 | 181.8 | 180.52      | 9.29     |
|                                                        | $\sigma_{\text{IrC1}}/\sigma_{\text{Ir(ppy)}_3}$ | 2.13  | 2.20  | 2.22  | 2.06  | 2.03  | <b>2.13</b> | 0.08     |
| IrC2<br>$\tau_0$ (2.76 $\mu\text{s}$ )                 | $I_0$                                            | 989.6 | 936.5 | 941.7 | 967.1 | 956.4 | 958.26      | 21.28    |
|                                                        | $I_{100}$                                        | 8.6   | 7.0   | 7.9   | 8.6   | 7.6   | 7.94        | 0.68     |
|                                                        | $I_0/I_{100-1}$                                  | 114.1 | 133.0 | 116.8 | 111.2 | 124.6 | 119.94      | 8.84     |
|                                                        | $\sigma_{\text{IrC2}}/\sigma_{\text{Ir(ppy)}_3}$ | 1.25  | 1.32  | 1.25  | 1.15  | 1.22  | <b>1.24</b> | 0.06     |
| IrC3<br>$\tau_0$ (3.19 $\mu\text{s}$ )                 | $I_0$                                            | 411.3 | 426.8 | 438.1 | 415.5 | 420.7 | 422.48      | 10.48    |
|                                                        | $I_{100}$                                        | 2.6   | 2.5   | 2.5   | 2.2   | 2.4   | 2.44        | 0.15     |
|                                                        | $I_0/I_{100-1}$                                  | 157.2 | 172.3 | 171.8 | 185.5 | 173.6 | 172.08      | 10.05    |
|                                                        | $\sigma_{\text{IrC3}}/\sigma_{\text{Ir(ppy)}_3}$ | 1.50  | 1.48  | 1.59  | 1.66  | 1.47  | <b>1.54</b> | 0.08     |

**Table S3.** Data of spin population analysis of IrC1-IrC3 and Ir(ppy)<sub>3</sub>.

|                      | Type                | $P_\alpha^a$ | $P_\beta^b$ | $P_{\alpha+\beta}^c$ | $P_{\text{spin}}^d$ | $P_{\text{spin}\%}^e$ |
|----------------------|---------------------|--------------|-------------|----------------------|---------------------|-----------------------|
| Ir(ppy) <sub>3</sub> | s orbitals          | 69.46972     | 69.40729    | 138.87701            | 0.06243             | 3.12%                 |
|                      | p orbitals          | 56.91048     | 55.35288    | 112.26335            | 1.55760             | 77.88%                |
|                      | d orbitals          | 4.61980      | 4.23983     | 8.85964              | 0.37997             | 19.00%                |
| IrC1                 | s orbitals          | 177.16242    | 177.08660   | 354.24902            | 0.07581             | 3.80%                 |
|                      | p orbitals          | 140.12143    | 138.45833   | 278.57975            | 1.66310             | 83.15%                |
|                      | d orbitals          | 5.71616      | 5.45507     | 11.17123             | 0.26109             | 13.05%                |
|                      | <b>TPA moieties</b> | 193.54344    | 193.31140   | 386.85484            | <b>0.23210</b>      | <b>11.61%</b>         |
| IrC2                 | s orbitals          | 174.46512    | 174.38946   | 348.85457            | 0.07566             | 3.78%                 |
|                      | p orbitals          | 139.77163    | 138.17281   | 277.94444            | 1.59881             | 79.94%                |
|                      | d orbitals          | 5.76326      | 5.43773     | 11.20098             | 0.32553             | 16.28%                |
|                      | <b>Cz1 moieties</b> | 190.55660    | 190.46800   | 381.02460            | <b>0.08862</b>      | <b>4.43%</b>          |
| IrC3                 | s orbitals          | 174.49119    | 174.41387   | 348.90506            | 0.07732             | 3.87%                 |
|                      | p orbitals          | 139.75181    | 138.13165   | 277.88347            | 1.62016             | 81.00%                |
|                      | d orbitals          | 5.75700      | 5.45448     | 11.21148             | 0.30252             | 15.13%                |
|                      | <b>Cz2 moieties</b> | 190.51510    | 190.38310   | 380.89820            | <b>0.13201</b>      | <b>6.60%</b>          |

<sup>a</sup> Population of  $\alpha$  electron. <sup>b</sup> Population of  $\beta$  electron. <sup>c</sup> Population of  $\alpha$  and  $\beta$  electron,  $P_{\alpha+\beta}=P_\alpha+P_\beta$ . <sup>d</sup> Spin population,  $P_{\text{spin}}=P_\alpha-P_\beta$ . <sup>e</sup> Percentages of spin population,  $P_{\text{spin}\%}=(100P_{\text{spin}}/2.00000)\%$ .

**The limits of detection (LODs) of IrC1-IrC3 and Ir(ppy)<sub>3</sub> in THF<sup>3</sup>**

$$LOD = \frac{3U_0}{K_{SV}^{app}}$$

Limit of detection (LOD)

Signal to noise ratio (S/N)  $S/N = 20 \log(U_1/U_0)$   $U_1$ : Signal amplitude  $U_0$ : Noise amplitude

Ir(ppy)<sub>3</sub>:  $U_1 = 511.3$ ,  $U_0 = 1.3$ ,  $S/N = 51.9$ ,  $LOD = 0.43$  mbar

IrC1:  $U_1 = 871.1$ ,  $U_0 = 1.3$ ,  $S/N = 56.5$ ,  $LOD = 0.27$  mbar

IrC2:  $U_1 = 989.6$ ,  $U_0 = 1.3$ ,  $S/N = 57.6$ ,  $LOD = 0.40$  mbar

IrC3:  $U_1 = 411.3$ ,  $U_0 = 1.3$ ,  $S/N = 50.0$ ,  $LOD = 0.28$  mbar

**Table S4.** Parameters of oxygen sensing films of IrC1-IrC3 and Ir(ppy)<sub>3</sub> with EC as the supporting matrix (fitting of the result to the two-site model).

| Complexes            | $\lambda_{ex}(nm)$ | $\lambda_{em}(nm)$ | $f_1^a$ | $f_2^a$ | $K_{SV1}^b$ | $K_{SV2}^b$ | $r^2$ <sup>c</sup> | $K_{SV}^{app}$ <sup>d</sup> |
|----------------------|--------------------|--------------------|---------|---------|-------------|-------------|--------------------|-----------------------------|
| Ir(ppy) <sub>3</sub> | 400                | 511                | 0.997   | 0.003   | 8.9         | 0.00001     | 0.99828            | 8.8                         |
| IrC1                 | 400                | 522                | 0.999   | 0.001   | 33.0        | 0.00001     | 0.99789            | 32.9                        |
| IrC2                 | 400                | 516                | 0.911   | 0.089   | 20.3        | 0.00001     | 0.96328            | 18.5                        |
| IrC3                 | 400                | 525                | 0.978   | 0.022   | 24.1        | 0.00001     | 0.99578            | 23.6                        |

<sup>a</sup> Ratio of the two portions of the Ir(III) complexes. <sup>b</sup> Quenching constant of the two portions (bar<sup>-1</sup>). <sup>c</sup> Determination coefficients. <sup>d</sup> Weighted quenching constant (bar<sup>-1</sup>).

**References.**

- 1 Y. Xing, C. Liu, J.-H. Xiu and J.-Y. Li, *Inorg. Chem.*, 2015, **54**, 7783.
- 2 A. B. Tamayo, B. D. Alleyne, P. I. Djurovich, S. Lamansky, I. Tsyba, N. N. Ho, R. Bau and M. E. Thompson, *J. Am. Chem. Soc.*, 2003, **125**, 7377.
- 3 X. D. Wang and O. S. Wolfbeis, *Chem. Soc. Rev.*, 2014, **43**, 3666.
